# Supplementary material
Source: Springer Nature journal article supplement (https://www.springermedizin.de/resource/supplementary/13069_2011_61_MOESM5_ESM.pdf/9659700)

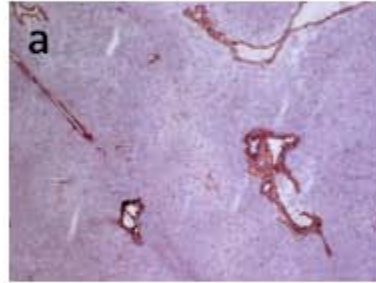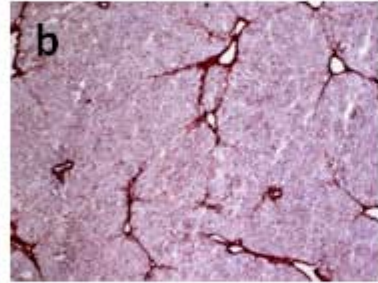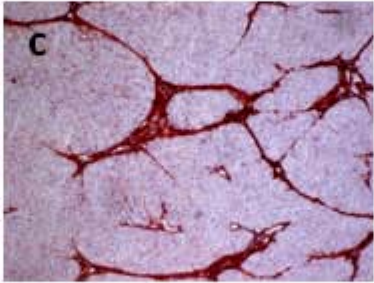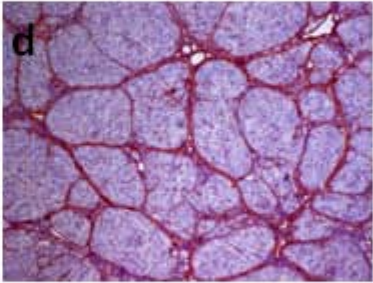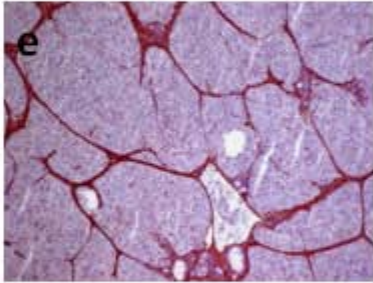

Supplement: MOESM5 [file 9659700]
